# Supplementary material for: Controllable Synthesis of 2D Perovskite on Different Substrates and Its Application as Photodetector
Source: MDPI journal article supplement (doi:10.3390/nano8080591), 2018-08-03
Supplement: s1 [file s1]

# Controllable Synthesis of 2D Perovskite on Different Substrates and Its Application as Photodetector

Yunzhou Xue <sup>1</sup>, Jian Yuan <sup>2</sup>, Jingying Liu <sup>3</sup> and Shaojuan Li <sup>2,\*</sup>

<sup>1</sup> College of Chemistry and Environmental Engineering, Shenzhen University, Shenzhen 518000, China; xueyz@iccas.ac.cn

<sup>2</sup> Collaborative Innovation Center of Suzhou Nano Science and Technology, Jiangsu Key Laboratory for Carbon-Based Functional Materials and Devices, Institute of Functional Nano and Soft Materials (FUNSOM), Soochow University, Suzhou 215123, China; jianyuan\_cq@126.com

<sup>3</sup> Department of Materials Science and Engineering, Monash University, Clayton, VIC 3800, Australia; jingying.liu@monash.edu

\* Correspondence: sjli@suda.edu.cn; Tel.: +86-0512-6588-2337

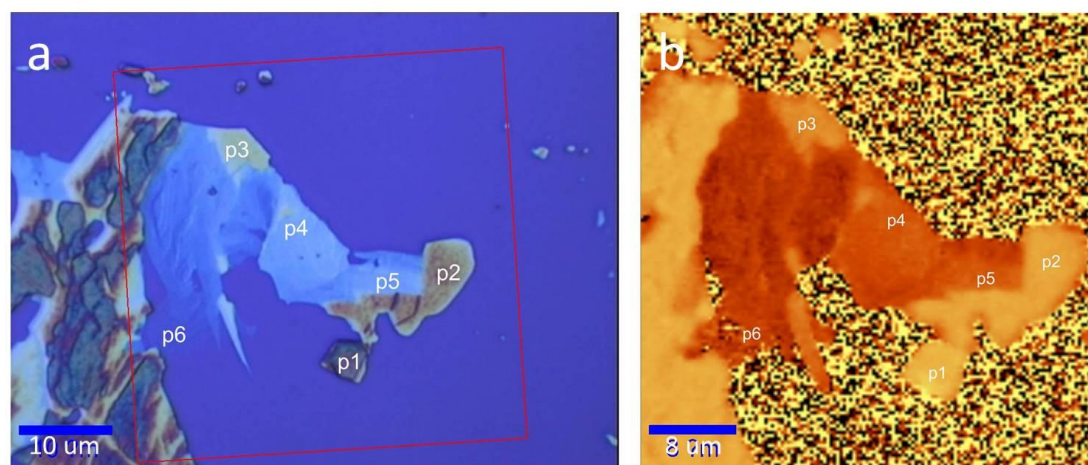

**Figure S1.** (a) CH<sub>3</sub>NH<sub>3</sub>PbI<sub>3</sub> perovskite with different thicknesses marked by p1 to p6. The thickness of P1 to P6 is measured to be 63 nm, 41 nm, 25 nm, 18 nm, 11 nm, 2 nm, respectively. (b) The corresponding PL mapping images of the CH<sub>3</sub>NH<sub>3</sub>PbI<sub>3</sub> perovskite acquired in the red square in (a).

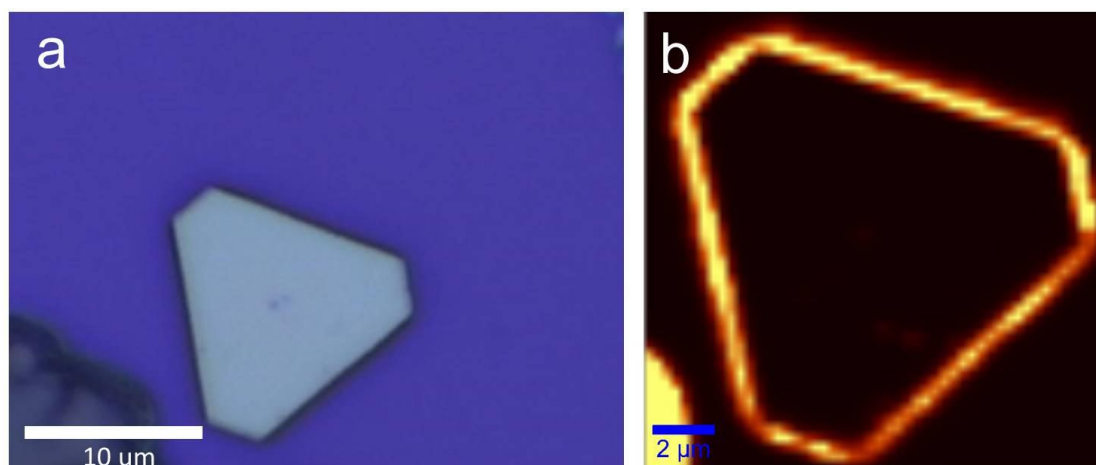

**Figure S2.** (a) Optical microscopy image of the converted CH<sub>3</sub>NH<sub>3</sub>PbI<sub>3</sub> perovskite without supplying sufficient CH<sub>3</sub>NH<sub>3</sub>I molecules during the conversion process on SiO<sub>2</sub>/Si substrate. (b) PL mapping image of the converted CH<sub>3</sub>NH<sub>3</sub>PbI<sub>3</sub> perovskite in (a).

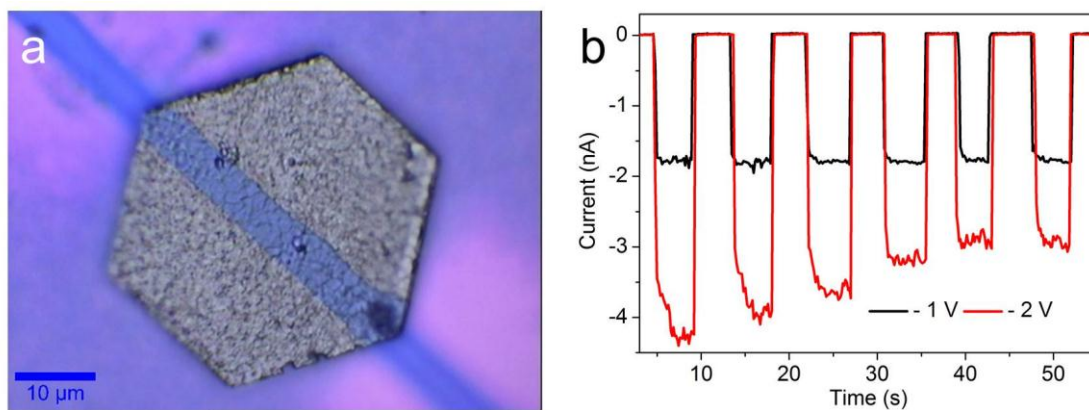

**Figure S3.** (a) Optical microscopy image of a 2D  $\text{CH}_3\text{NH}_3\text{PbI}_3$  platelet phototransistor. (b) Time-dependent photocurrent of the 2D  $\text{CH}_3\text{NH}_3\text{PbI}_3$  platelet phototransistor during the laser switching on/off process under negative source-drain voltages  $V_{\text{sd}}$  of  $-1$  and  $-2\ \text{V}$ .
